# Supplementary material for: Effect of body weight on chronic kidney disease in patients with type II diabetes mellitus without proteinuria
Source: Research Square preprint supplement (doi:10.21203/rs.3.rs-8057038/v1), 2025-12-01
Supplement: Supplementary file 1 [file 8a402c10e0558088f9cc5a30.docx]

**Effect of body weight on chronic kidney disease in patients with type II diabetes mellitus without proteinuria**

Hyung Jung Oh, Seonghyeon Bu, Seoree Kim, Dukmoon Chung, Su Hyun Kim, Nay Aung, Kyung-Do Han, Hyo-Suk Ahn

Supplementary Table S1. Subgroup analysis for the impact of weight change on the incidence of CKD

| **Subgroup** | **Weight change** | **Total** | **CKD** | **Rate (%)** | **OR (95% CI)** | **P for interaction** |
| --- | --- | --- | --- | --- | --- | --- |
| **Age <65 years** | **≤-10%** | 22,273 | 1,192 | 5.35 | 1.032 (0.970–1.097) | <.0001 |
|  | **-10–≤-5%** | 100,624 | 4,924 | 4.89 | 0.955 (0.925–0.986) |  |
|  | **-5–≤5%** | 566,871 | 27,915 | 4.92 | 1.000 (Ref.) |  |
|  | **5–≤10%** | 58,248 | 3,313 | 5.69 | 1.268 (1.220–1.317) |  |
|  | **>10%** | 16,605 | 1,118 | 6.73 | 1.651 (1.547–1.761) |  |
| **Age ≥65 years** | **≤-10%** | 8,490 | 1,508 | 17.76 | 1.030 (0.971–1.093) |  |
|  | **-10–≤-5%** | 32,099 | 5,134 | 15.99 | 0.995 (0.961–1.029) |  |
|  | **-5–≤5%** | 156,551 | 24,026 | 15.35 | 1.000 (Ref.) |  |
|  | **5–≤10%** | 15,575 | 2,716 | 17.44 | 1.170 (1.118–1.224) |  |
|  | **>10%** | 4,617 | 847 | 18.35 | 1.245 (1.150–1.348) |  |
| **HTN (-)** | **≤-10%** | 14,087 | 673 | 4.78 | 1.016 (0.936–1.103) | 0.0184 |
|  | **-10–≤-5%** | 62,987 | 2,747 | 4.36 | 0.973 (0.932–1.016) |  |
|  | **-5–≤5%** | 348,208 | 14,403 | 4.14 | 1.000 (Ref.) |  |
|  | **5–≤10%** | 37,761 | 1,694 | 4.49 | 1.198 (1.136–1.264) |  |
|  | **>10%** | 11,234 | 637 | 5.67 | 1.641 (1.507–1.787) |  |
| **HTN (+)** | **≤-10%** | 16,676 | 2,027 | 12.16 | 1.034 (0.984–1.087) |  |
|  | **-10–≤-5%** | 6,9736 | 7,311 | 10.48 | 0.973 (0.946–1.000) |  |
|  | **-5–≤5%** | 375,214 | 37,538 | 10 | 1.000 (Ref.) |  |
|  | **5–≤10%** | 3,6062 | 4,335 | 12.02 | 1.234 (1.192–1.279) |  |
|  | **>10%** | 9,988 | 1,328 | 13.3 | 1.380 (1.296–1.469) |  |
| **Abdominal obesity (-)** | **≤-10%** | 1,6385 | 1,289 | 7.87 | 1.022 (0.962–1.086) | 0.7104 |
| **(M) WC<90 cm,**  **(F) WC<85 cm** | **-10–≤-5%** | 7,8032 | 5,263 | 6.74 | 0.976 (0.945–1.007) |  |
|  | **-5–≤5%** | 462,596 | 29,207 | 6.31 | 1.000 (Ref.) |  |
|  | **5–≤10%** | 54,118 | 3,959 | 7.32 | 1.230 (1.186–1.276) |  |
|  | **>10%** | 16,144 | 1,362 | 8.44 | 1.487 (1.399–1.580) |  |
| **Abdominal obesity (+)** | **≤-10%** | 14,378 | 1,411 | 9.81 | 1.039 (0.978–1.103) |  |
| **(M) WC≥90 cm,**  **(F) WC≥85 cm** | **-10–≤-5%** | 54,691 | 4,795 | 8.77 | 0.970 (0.938–1.004) |  |
|  | **-5–≤5%** | 260,826 | 22,734 | 8.72 | 1.000 (Ref.) |  |
|  | **5–≤10%** | 19,705 | 2,070 | 10.5 | 1.208 (1.149–1.270) |  |
|  | **>10%** | 5,078 | 603 | 11.87 | 1.384 (1.262–1.517) |  |

CKD, chronic kidney disease; CI, confidence interval; F, female; HTN, hypertension; M, male; OR, odds ratio; WC, waist circumference
